# Supplementary figures and images for: Microglia Polarization from M1 toward M2 Phenotype Is Promoted by Astragalus Polysaccharides Mediated through Inhibition of miR‐155 in Experimental Autoimmune Encephalomyelitis
Source: Hindawi journal article supplement (doi:10.1155/2021/5753452), 2021-01-01

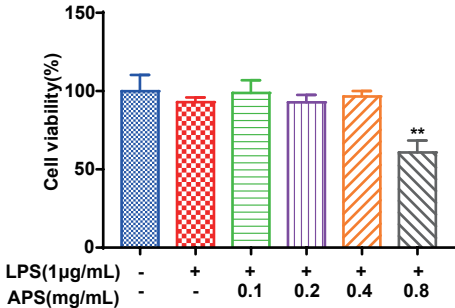

Supplement: f1 [file 5753452.f1.zip]
